# Supplementary material for: Zero-Biased Photoelectrochemical Detection of Cardiac Biomarker Myoglobin Based on CdSeS/ZnS Quantum Dots and Barium Titanate Perovskite
Source: MDPI journal article supplement (doi:10.3390/molecules27154778), 2022-07-26
Supplement: s1 [file s1]

**Table S1.** Analytical characteristics of immunosensors for Mb and comparison of materials with the platform proposed.

| Analytical Method                 | Matrix                                                                  | T <sub>incubation</sub> | Working Range                                                            | LD                                                    | Ref.      |
|-----------------------------------|-------------------------------------------------------------------------|-------------------------|--------------------------------------------------------------------------|-------------------------------------------------------|-----------|
| SWV                               | AuNP-PEI                                                                | 10 min                  | 9.96 – 72.8 ng mL <sup>-1</sup>                                          | 6.29 ng mL <sup>-1</sup>                              | [3]       |
| EIS                               | ab-Mb/MUA-MPA/Au                                                        | 1.5 h                   | 10 – 650 ng mL <sup>-1</sup>                                             | 5.2 ng mL <sup>-1</sup>                               | [5]       |
| SPR                               | μCIP SPR                                                                | 30 min                  | 0.1 – 1.0 μg mL <sup>-1</sup>                                            | 26.3 ng mL <sup>-1</sup>                              | [11]      |
| Chemiluminescence                 | Luminol-Mb-K <sub>4</sub> Fe(CN) <sub>6</sub>                           | -                       | 0.1 – 100 nmol L <sup>-1</sup>                                           | 0.04 nmol L <sup>-1</sup>                             | [34]      |
| Chronocoulometry                  | DNA aptamers                                                            | 60 min                  | 10 pmol L <sup>-1</sup> – 100 nmol L <sup>-1</sup>                       | 10 pmol L <sup>-1</sup>                               | [35]      |
| ECL                               | RGO/ Ru(bpy) <sub>3</sub> <sup>2+</sup> / CS                            | 30 min                  | 0.05 – 25 nmol L <sup>-1</sup>                                           | 12 pmol L <sup>-1</sup>                               | [36]      |
| CV                                | Aptamer functionalized rGO/CNT                                          | -                       | 1 ng mL <sup>-1</sup> – 4 μg mL <sup>-1</sup>                            | 0.34 ng mL <sup>-1</sup><br>0.034 ng mL <sup>-1</sup> | [37]      |
| CV                                | Ti-NT/GCE                                                               | -                       | 0.001 – 0.1 mg mL <sup>-1</sup>                                          | 1 μg mL <sup>-1</sup>                                 | [38]      |
| DPV                               | DApt-CS                                                                 | 45 min                  | 100 pmol L <sup>-1</sup> – 40 nmol L <sup>-1</sup>                       | 27 pmol L <sup>-1</sup>                               | [39]      |
| FIA                               | MB-MWNTs                                                                | -                       | 0.1 – 3 μmol L <sup>-1</sup>                                             | 20 nmol L <sup>-1</sup>                               | [40]      |
| EIS                               | MnO <sub>x</sub> CoO <sub>y</sub> ,500                                  | 1 h                     | 0.01 – 2000 pg mL <sup>-1</sup>                                          | 0.56 fg mL <sup>-1</sup>                              | [41]      |
| EIS                               | MIP(PSA, Myo)-SPE                                                       | 60 min                  | 1 – 20000 ng mL <sup>-1</sup>                                            | 0.83 ng mL <sup>-1</sup>                              | [42]      |
| EIS                               | GQDs modified SPE                                                       | 10 min                  | 0.01 – 100 ng mL <sup>-1</sup>                                           | 0.01 ng mL <sup>-1</sup>                              | [43]      |
| SWV                               | SPE/CB/DDAB                                                             | 15 min                  | 5 – 500 μmol L <sup>-1</sup>                                             | -                                                     | [44]      |
| DPV                               | Apt/AuNPs/BNNSs/FTO                                                     | -                       | 0.1 – 100 μg mL <sup>-1</sup>                                            | 34.6 ng mL <sup>-1</sup>                              | [45]      |
| PEC <sup>a</sup>                  | g-C <sub>3</sub> N <sub>4</sub> -MoS <sub>2</sub> @CdS:Mn nanocomposite | 1 h                     | 1.0 pg mL <sup>-1</sup> – 50 ng mL <sup>-1</sup>                         | 0.42 pg mL <sup>-1</sup>                              | [46]      |
| Fluorescence <sup>b</sup>         | CdTe-MPA-QDs                                                            | 30 min                  | 0.304-571 pg mL <sup>-1</sup>                                            | 0.045 pg mL <sup>-1</sup>                             | [47]      |
| CV                                | SnO <sub>2</sub> -QDs@3DGR                                              | -                       | 5.0 - 94.0 mmol L <sup>-1</sup>                                          | 0.35 mmol L <sup>-1</sup>                             | [48]      |
| Fluorescence                      | WS <sub>2</sub> QDs                                                     | 60 min                  | 0.01-120 μg mL <sup>-1</sup>                                             | 7.6 ng mL <sup>-1</sup>                               | [49]      |
| Photoluminescence <sup>c</sup>    | CD-CdTe                                                                 | -                       | 0 – 2.0 μmol L <sup>-1</sup>                                             | -                                                     | [50]      |
| CV/EIS                            | Mn doped TiO <sub>2</sub> nanoparticles                                 | -                       | 3-15 nmol L <sup>-1</sup>                                                | 0.22 ng mL <sup>-1</sup>                              | [51]      |
| PEC <sup>d</sup><br>(amperometry) | CdSeS/ZnSQDs/BaTiO <sub>3</sub>                                         | 40 min or<br>0.67 h     | 10 pg mL <sup>-1</sup> – 1 μg mL <sup>-1</sup>                           | 10 pg mL <sup>-1</sup>                                | This work |
|                                   |                                                                         |                         | 0.01 ng mL <sup>-1</sup> – 1000 ng mL <sup>-1</sup>                      | 0.01 ng mL <sup>-1</sup>                              |           |
|                                   |                                                                         |                         | 5.62x10 <sup>-4</sup> nmol L <sup>-1</sup> – 0.0562 μmol L <sup>-1</sup> | 5.62x10 <sup>-4</sup> nmol L <sup>-1</sup>            |           |

CV: Cyclic Voltammetry; DPV: Differential Pulse Voltammetry; EIS: Electrochemical Impedance Spectroscopy; SWV: Square Wave Voltammetry; SPR: Surface Plasmon Resonance; PEC: Photoelectrochemical. <sup>a,c</sup>The authors use a 500 W Xenon lamp; <sup>b</sup>The authors use a 150 W Xenon lamp; <sup>d</sup>The authors use a 30 W visible LED lamp.

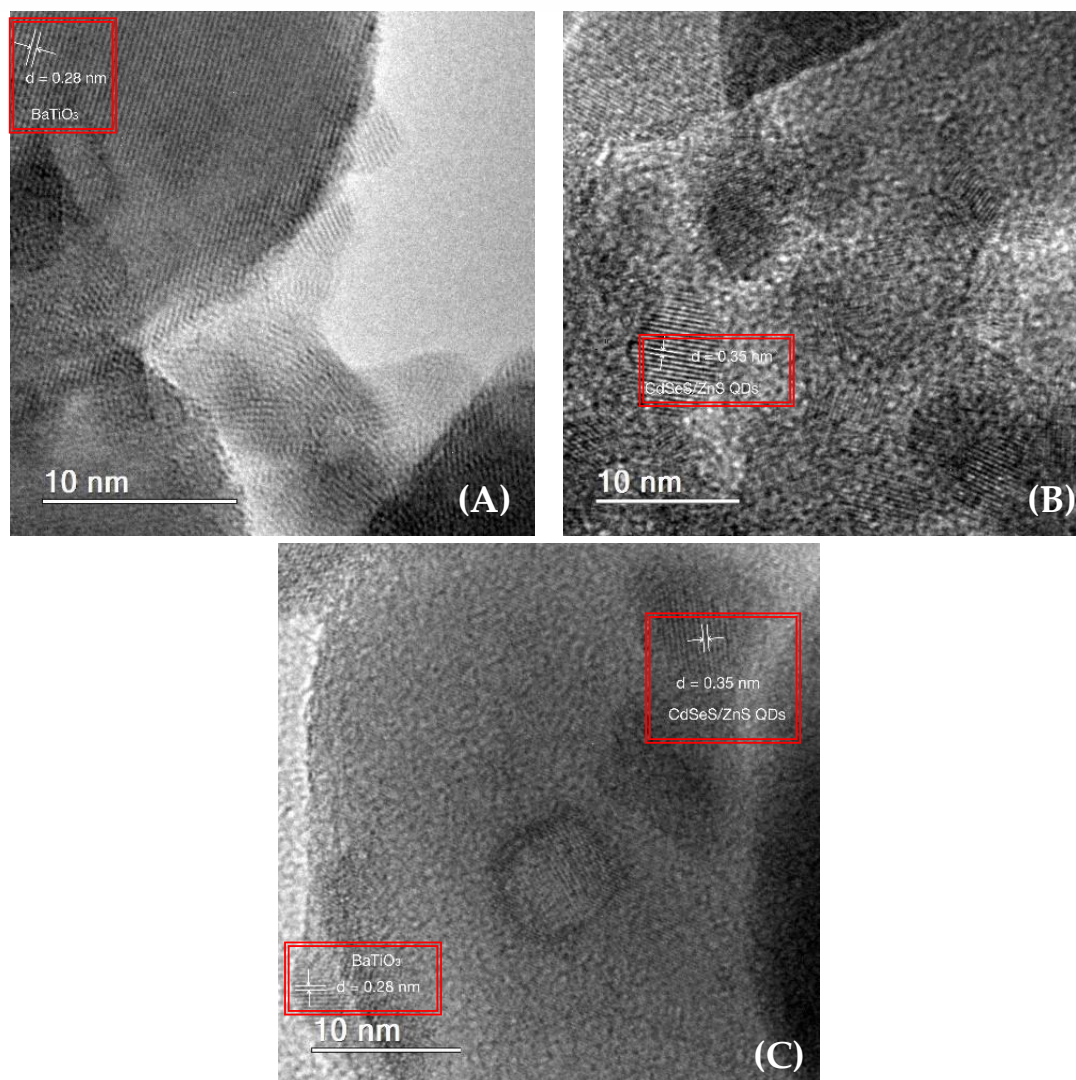

Figure S1: TEM images of three different regions of CdSeS/ZnS QDs/BTO material.
